# Supplementary material for: Enrichment of persisters enabled by a ß-lactam-induced filamentation method reveals their stochastic single-cell awakening
Source: PubMed Central journal article supplement (PMC6884588; doi:10.1038/s42003-019-0672-3), 2019-11-29
Supplement: 42003_2019_672_MOESM2_ESM.pdf [file 42003_2019_672_MOESM2_ESM.pdf]

## **Description of additional supplementary items**

**File name:** Supplementary Movie 1

**Description:** Susceptible, exponential phase cells on an MHB+agarose pad supplemented with cephalixin (50 µg/ml) filament severely before lysis occurs.

**File name:** Supplementary Movie 2

**Description:** Cells isolated by cephalixin treatment and filtration remain unaffected on an MHB+agarose pad supplemented with cephalixin (50 µg/ml).

**File name:** Supplementary Movie 3

**Description:** Most cells isolated by cephalixin treatment and filtration reinitiate growth on an MHB+agarose pad.
